# Supplementary material
Source: PubMed Central journal article supplement (PMC3668563)
Supplement: NIHMS471081-supplement-01.pdf [file NIHMS471081-supplement-01.pdf]

# WRIST

Wrist and Radius Injury Surgical Trial

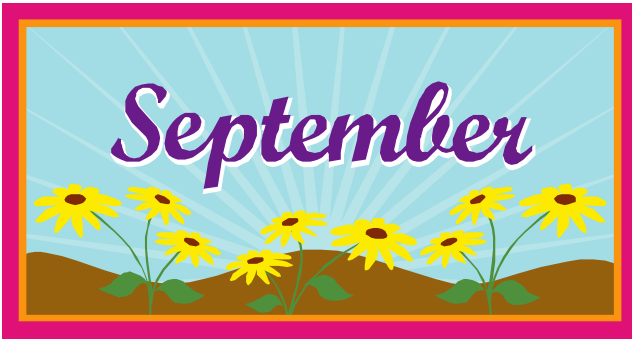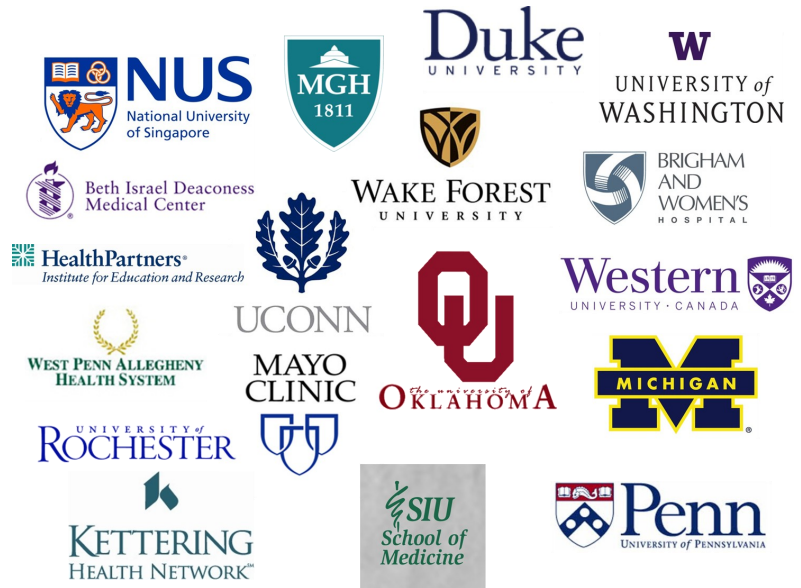

## A letter to the PIs from Dr. Chung

Dear WRIST Investigators:

The summer is coming to an end and I hope you have enjoyed a bit of rest during summer vacation. I hope I can encourage you to continue to engage your colleagues in recruiting all potential patients who satisfy the inclusion criteria for our study. I have spoken to several of you and I very much appreciate the support in soliciting additional investigators in your respective catchment areas. You can see from the recruitment graph, our numbers are extremely low. This is due to many factors, one of which is that these injuries typically do not occur during the summer. One of the issues I want to bring to your attention is that a couple of sites have not been able to begin screening because of internal issues. I hope the entire WRIST group can count on your support to push your staff and colleagues toward recruitment as part of this collaborative effort. If we all work together, I am sure that we will meet the recruitment target, particularly during the winter months. I look forward to talking with each of you individually in order to understand your local environment so I can be helpful to you.

Perhaps some of you know sites that would be ideal to participate in this project. If that's the case, I would welcome your query to a particular site and once they have expressed interest for you to share with me their information so that I can contact the potential PI at these sites personally to continue our effort.

I look forward to seeing you at our WRIST meeting on **Saturday September 8th at 6am in the San Francisco room** of the Hyatt Regency Chicago, so that we can discuss in-depth how to improve our recruitment. I wish you safe travels to the ASSH meeting and we will continue to lean on each other for support and to continue this outstanding project.

# WRIST

## Announcement

Year 2 subcontracts are in the works! All questions regarding subcontracts can be addressed to Sara Hyde (showden@umich.edu) at the UM Grants and Contracts office. Please cc Melissa or Sunitha on your correspondences.

Randomized Participants: Expected vs Actual

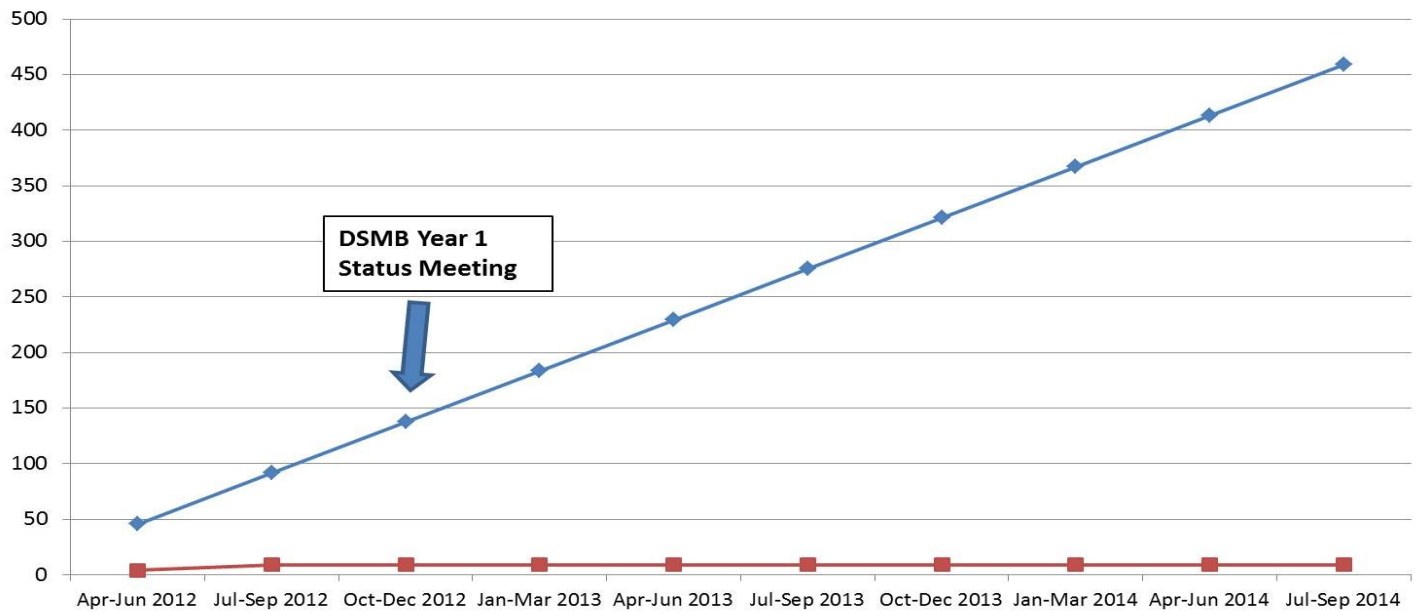

Observation Participants: Expected vs Actual

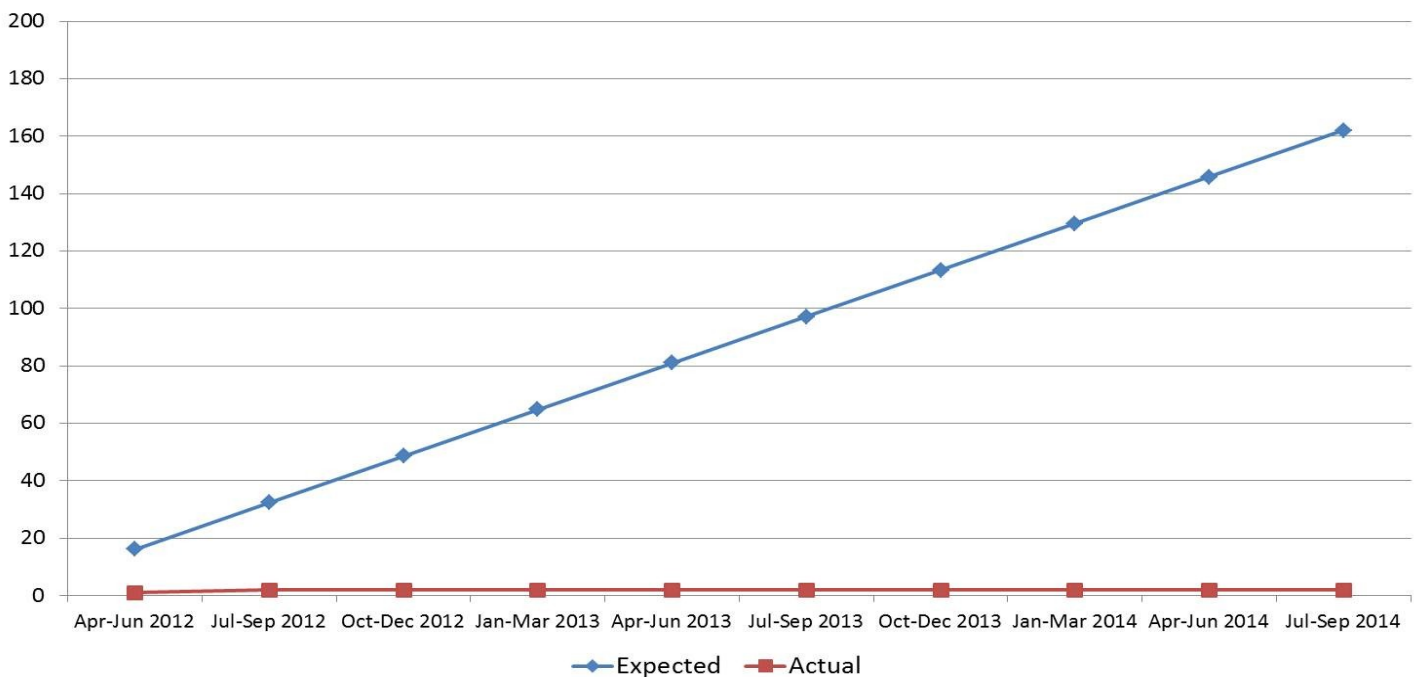

# WRIST

## The People of WRIST

Congratulations to **Michael Neumeister, MD**, PI at Southern Illinois University for being named Chair of the Department of Surgery at SIU School of Medicine!

Farewell to **Jillian Gruber, BA**, Clinical Research Coordinator at Massachusetts General Hospital. Jillian will be leaving MGH to spend 8 months working at St. Boniface Hospital in Fond-des-Blancs, Haiti. Best wishes Jillian and thank you for all your hard work! Jillian will be replaced by **Raj Reddy**. Welcome Raj!

Also joining the WRIST team is **Masai Mcintosh**! Masai is a Clinical Research Technician at the University of Connecticut and will be serving as research coordinator for that site. Welcome Masai!

Another big WRIST “hello” to **David Boman** who joined the University of Washington team as research coordinator this month. Welcome David!

## Recruitment by site

|                    | <u>08/12 (R/O*)</u> | <u>To Date (R/O)</u> |
|--------------------|---------------------|----------------------|
| Allegheny Health   | 0                   | 0                    |
| Beth Israel        | 0                   | 0                    |
| Br & W             | 0                   | 0                    |
| Duke               | 0                   | 1 (1/0)              |
| HealthPartners     | 0                   | 0                    |
| Kettering          | 1 (0/1)             | 1 (0/1)              |
| Mass General       | 1 (1/0)             | 2 (2/0)              |
| Mayo Clinic        | 1 (1/0)             | 1 (1/0)              |
| National Univ.     | 0                   | 0                    |
| Southern Illinois  | 0                   | 0                    |
| Univ. Connecticut  | 0                   | 0                    |
| Univ. Michigan     | 1 (1/0)             | 3 (2/1)              |
| Univ. Oklahoma     | 0                   | 0                    |
| Univ. Pennsylvania | 0                   | 0                    |
| Univ. Rochester    | 1 (1/0)             | 1 (1/0)              |
| Univ. Washington   | 0                   | 0                    |
| Univ. Western ON   | 0                   | 0                    |
| Wake Forest        | 0                   | 2 (2/0)              |
| <b>TOTAL</b>       | <b>4 (4/0)</b>      | <b>10 (9/1)</b>      |

\*(Randomized/Observation)

# WRIST

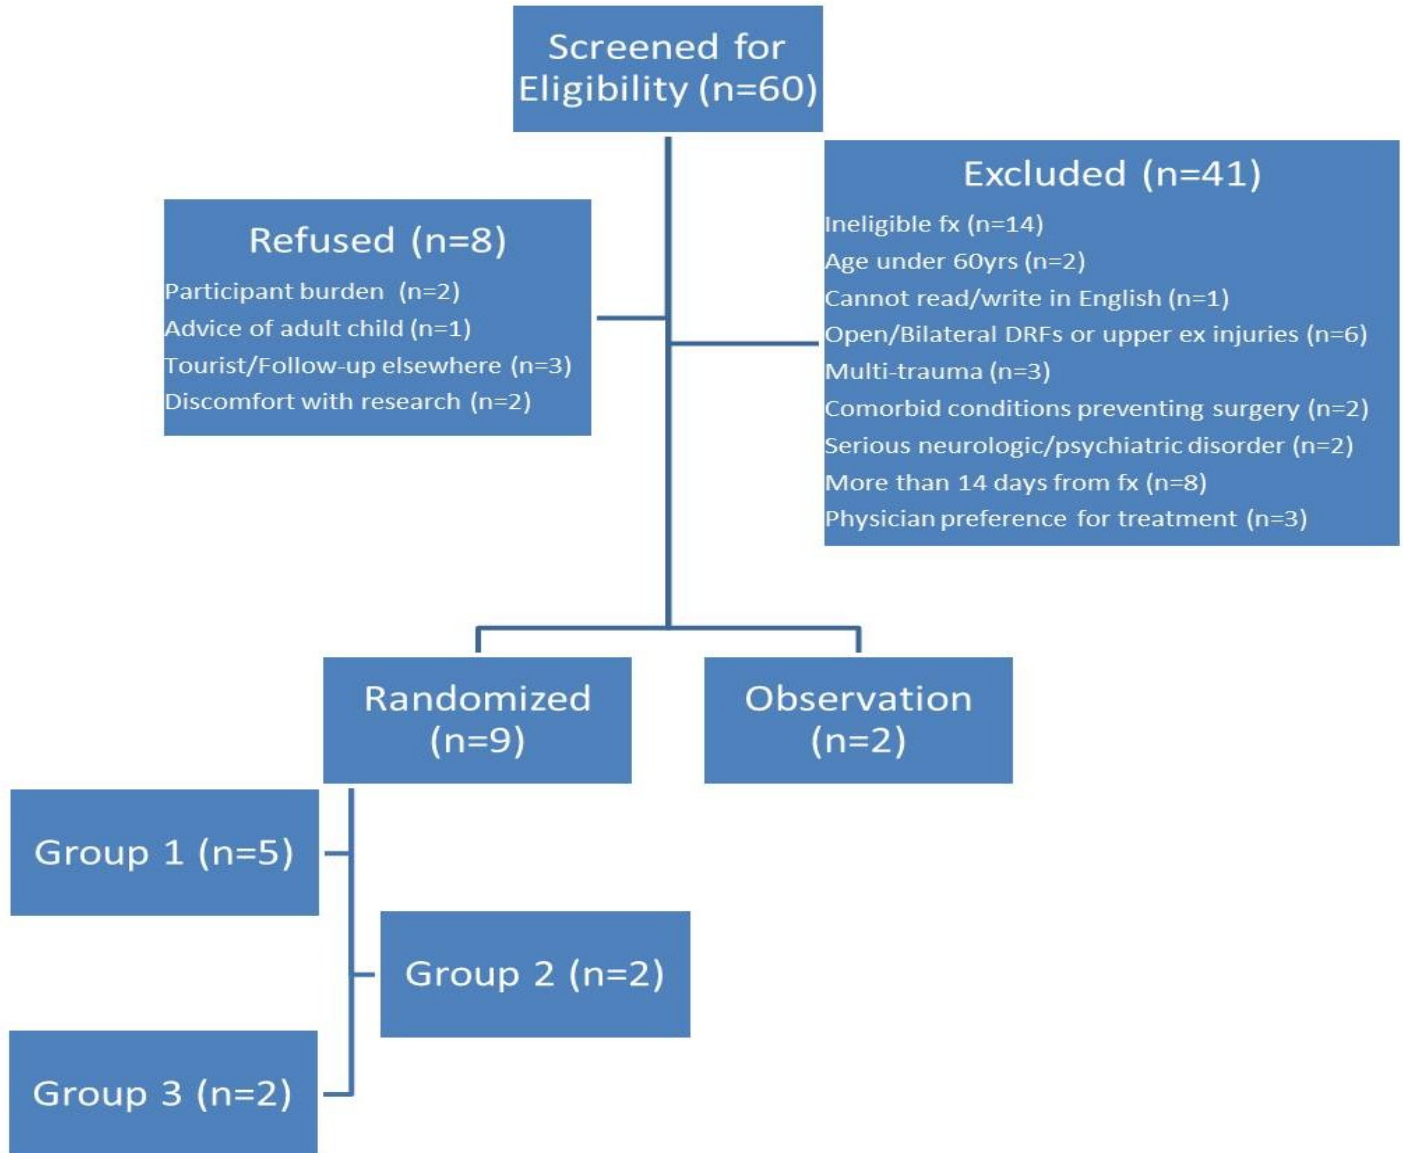

## ***Clarification about the 2 week screening period:***

Your screening logs have told us that 20% of screen failures are due to patients presenting for treatment more than 2 weeks after injury. The origin of this exclusion criteria, developed during the August 2011 consensus meeting, was to prevent the randomization of patients whose fractures had already begun to heal. However, this can occur prior to 2 weeks. Likewise there are patients' whose fractures are amenable to any of the 3 surgical treatment methods 2 weeks after fracture or later. If you feel that a patient you are screening is eligible despite a fracture more than 2 week prior, please contact Dr. Chung (kechung@umich.edu) day or night to discuss the specifics of the case.
